# Supplementary material
Source: MDPI journal article supplement (https://www.mdpi.com/2072-4292/11/13/1569)
Supplement: s1 [file s1]

# **Supplementary Materials: Analyzing Temporal and Spatial Characteristics of Crop Parameters Using Sentinel-1 Backscatter Data**

Katharina Harfenmeister <sup>1,\*</sup> , Daniel Spengler <sup>1</sup>  and Cornelia Weltzien <sup>2,3</sup> 

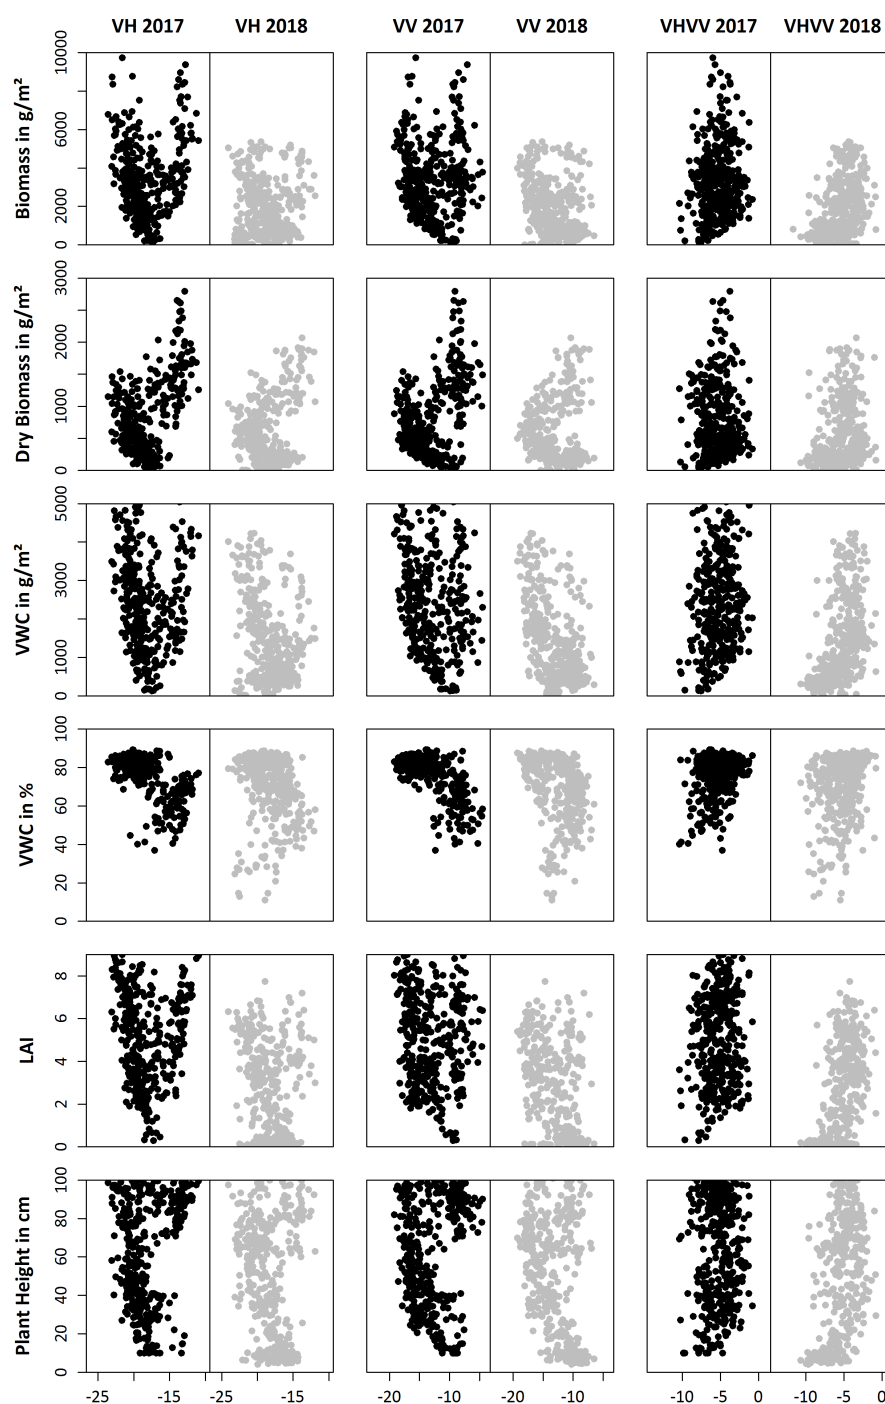

**Figure S1.** Scatter plots of crop parameters related to backscatter parameters for all barley fields in 2017 (black points) and 2018 (gray points).

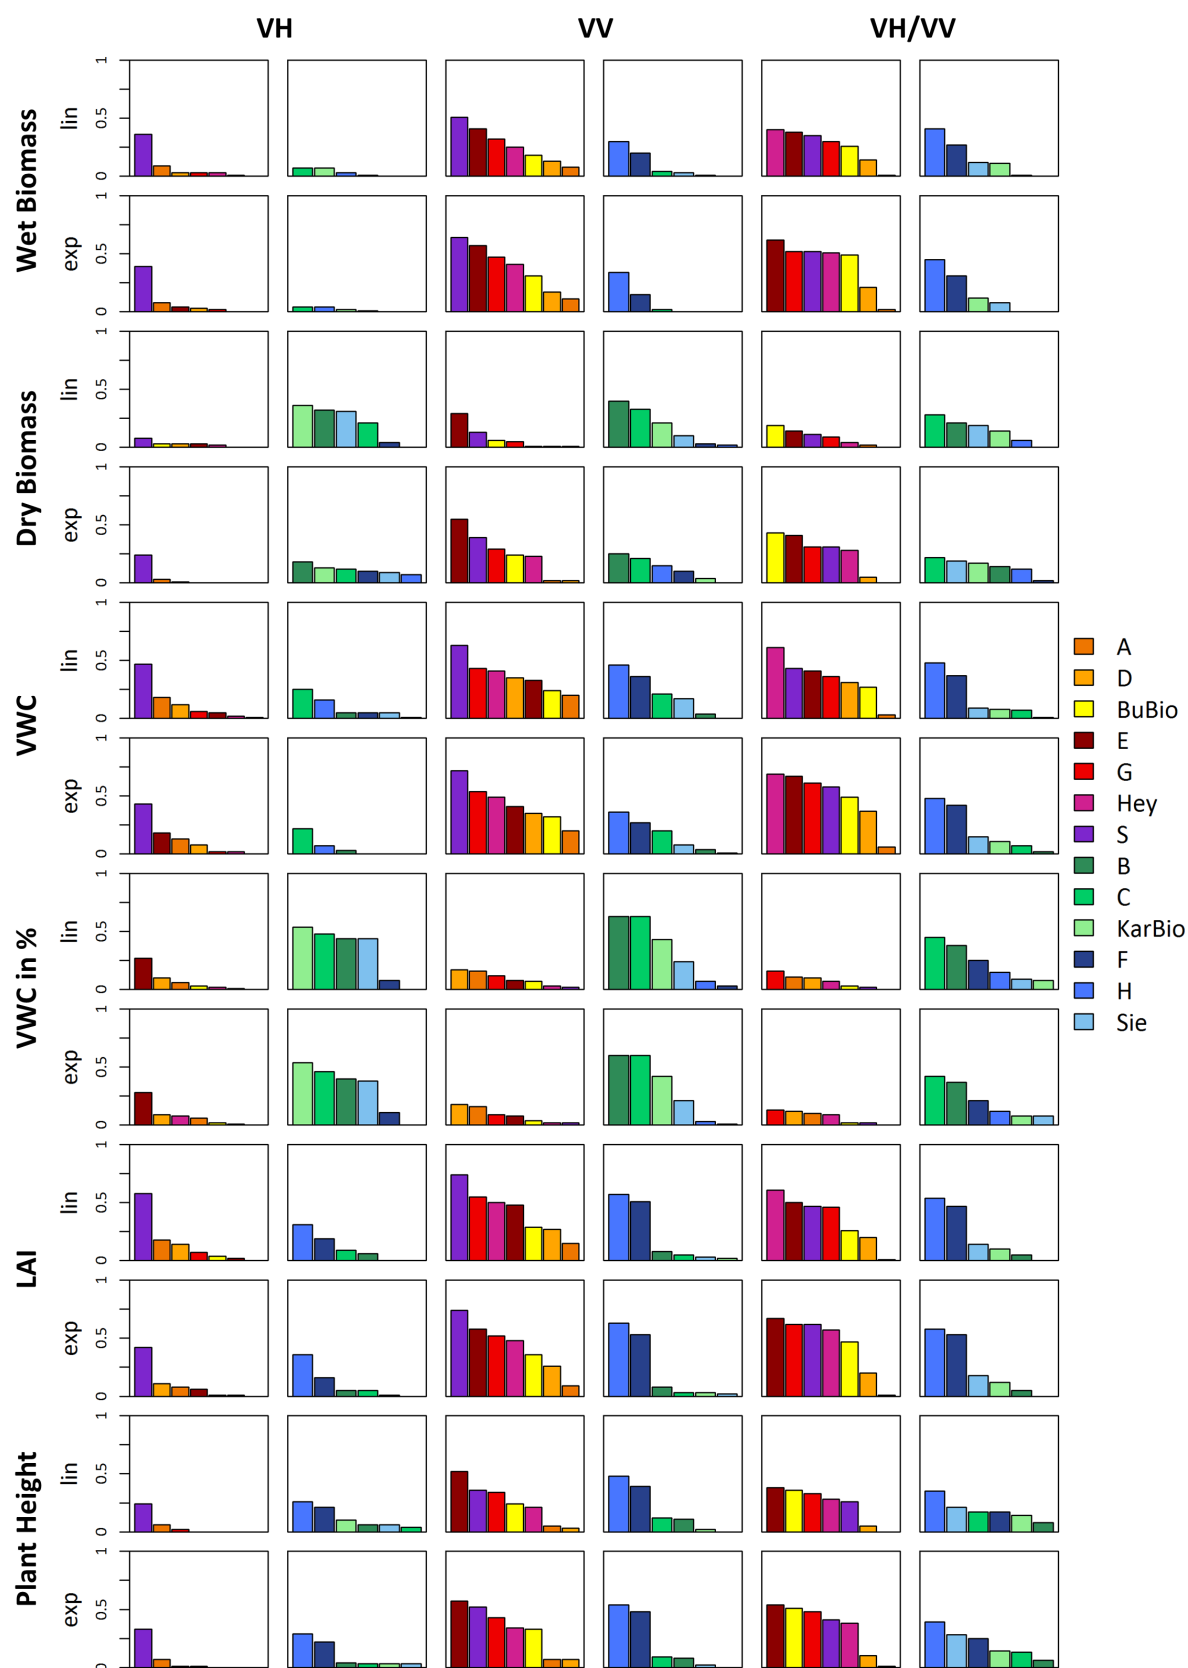

**Figure S2.** Bar plots of  $R^2$  values of regression between crop and backscatter parameters per crop type for single fields.

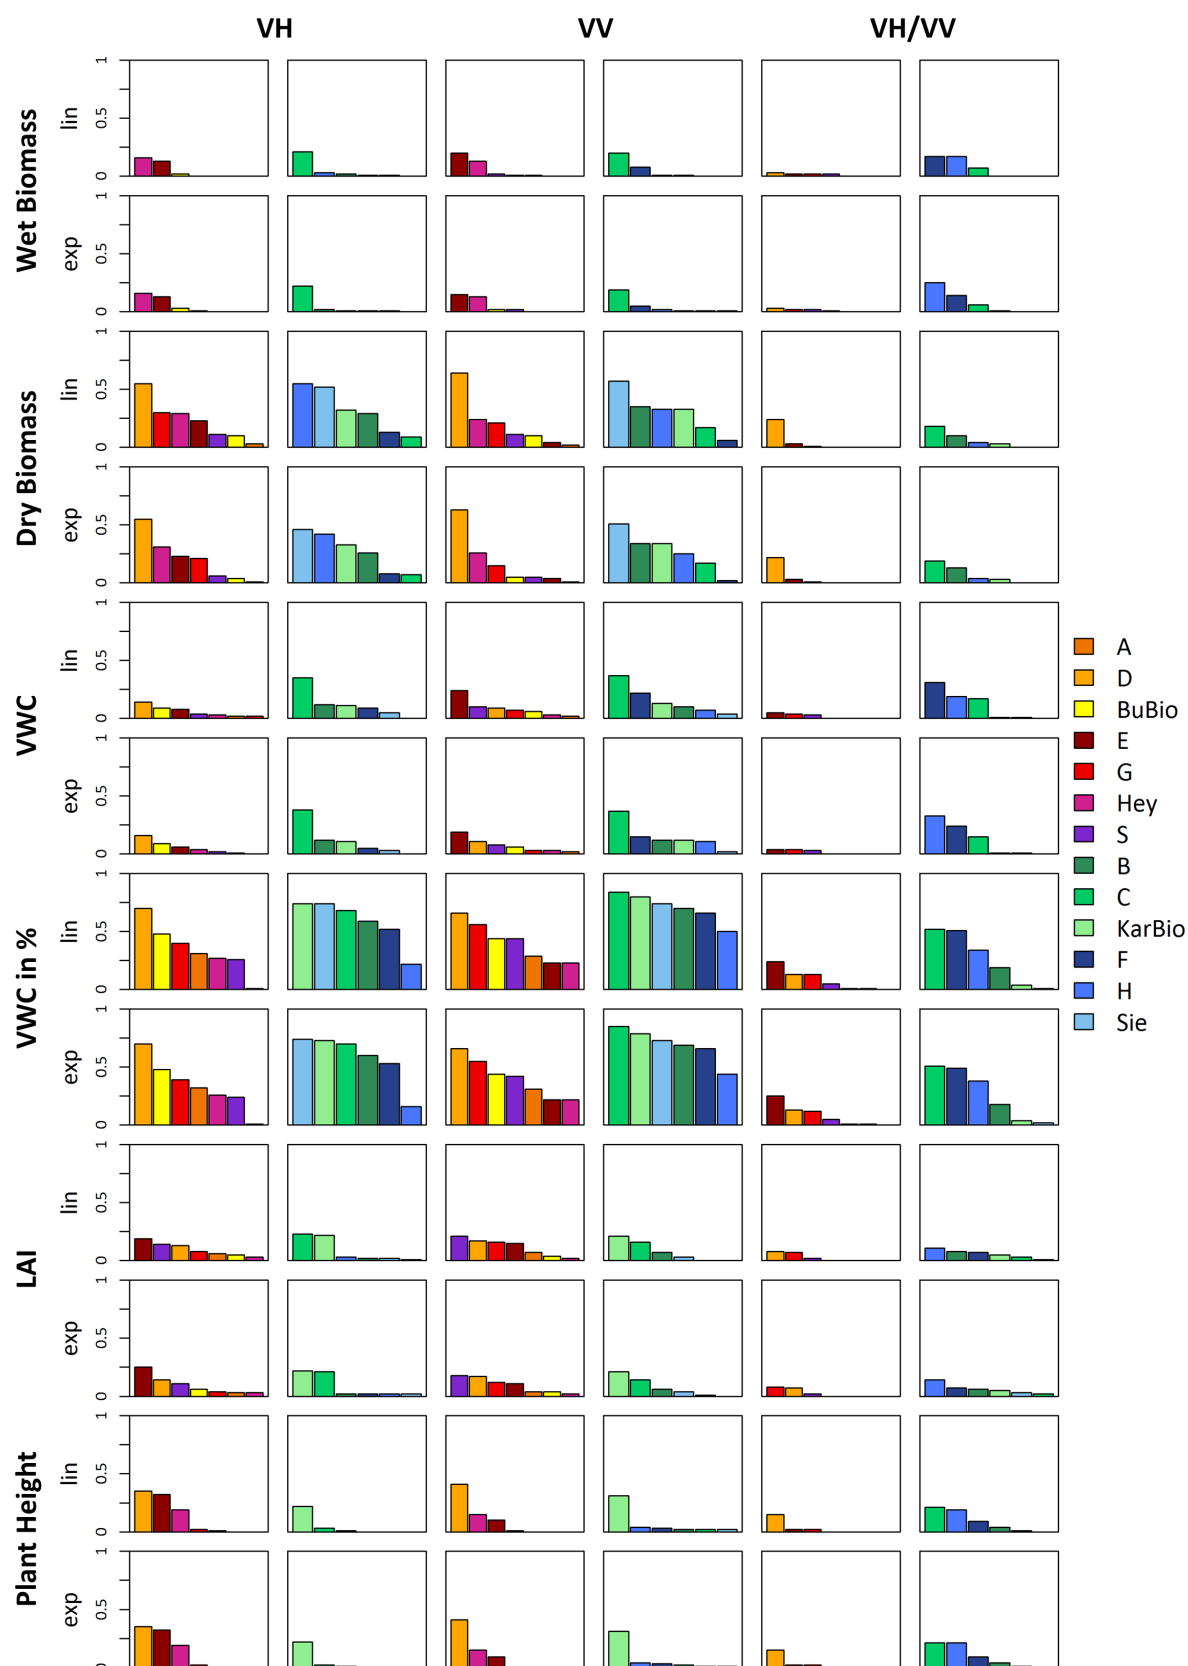

**Figure S3.** Bar plots of  $R^2$  values of regression between crop and backscatter parameters per crop type for single fields in BBCH stages 51–77.

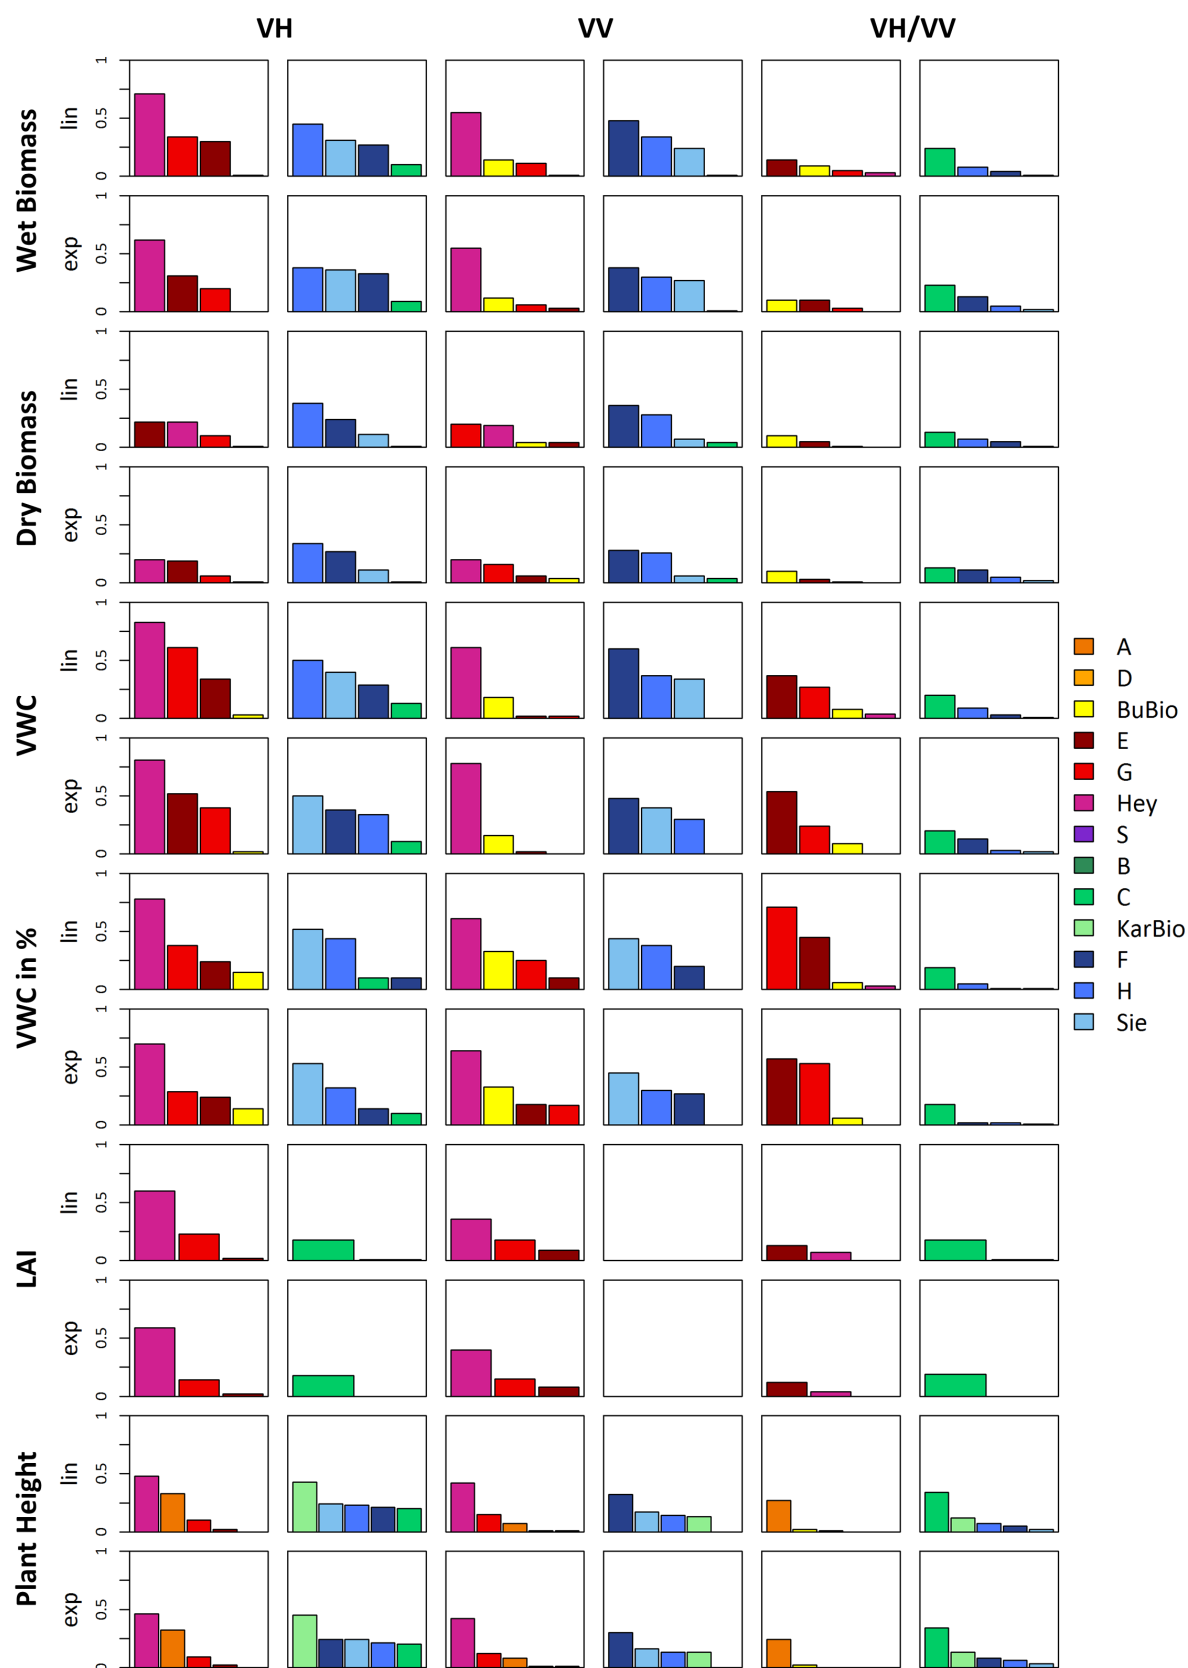

**Figure S4.** Bar plots of  $R^2$  values of regression between crop and backscatter parameters per crop type for single fields in BBCH stages 83–99.
